# Supplementary material
Source: Springer Nature journal article supplement (https://www.springermedizin.de/resource/supplementary/13049_2011_268_MOESM6_ESM.pdf/9666224)
Supplement: MOESM6 [file 9666224]

|                                                                                                     | CRAMS; Gormican-82 | PHI; Koehler-86 | T-RTS; Champion-89 | PSS; Husum-03 | MGAP; Sartorius-10 |            |
|-----------------------------------------------------------------------------------------------------|--------------------|-----------------|--------------------|---------------|--------------------|------------|
| 1. Adequate follow up?                                                                              | ●                  | ?               | ?                  | ?             | ●                  |            |
| 2. Rationale to include predictors discussed?                                                       | ●                  | ●               | ●                  | ●             | ●                  |            |
| 3. Predictors clearly defined?                                                                      | ●                  | ●               | ●                  | ●             | ●                  |            |
| 4. Predicted outcomes valid?                                                                        | ●                  | ●               | ●                  | ●             | ●                  |            |
| 5. Missing data adequately managed?                                                                 | ?                  | ?               | ?                  | ?             | ?                  |            |
| 6. Adequate strategy to build the multivariable model?                                              | ●                  | ?               | ●                  | ●             | ●                  |            |
| 7. Interactions examined?                                                                           | ?                  | ?               | ?                  | ?             | ●                  |            |
| 8. Continuous variables handled appropriately?                                                      | ?                  | ●               | ●                  | ?             | ●                  |            |
| 9. >10 events per variable?                                                                         | ?                  | ●               | ●                  | ●             | ●                  |            |
| 10. Description of the sample?                                                                      | ●                  | ●               | ?                  | ●             | ●                  |            |
| 11. Clearly explained how to estimate the prognosis?                                                | ●                  | ●               | ●                  | ●             | ●                  |            |
| 12. Were measures of accuracy reported?                                                             | ●                  | ●               | ●                  | ●             | ●                  |            |
| 13. Were confidence intervals presented?                                                            | ●                  | ●               | ●                  | ●             | ●                  |            |
| 14. Was the prognostic model internally validated?                                                  | ?                  | ●               | ?                  | ?             | ●                  |            |
| 15. How many studies validated the model externally?                                                | 2                  | 6               | 7                  | 0             | 1                  |            |
| 16. Was the clinical credibility of the prognostic model evaluated?                                 | ●                  | ●               | ●                  | ●             | ●                  |            |
| 17. Does the prognostic model improve clinical outcomes when tested in a randomised clinical trial? | ●                  | ●               | ●                  | ●             | ●                  |            |
|                                                                                                     |                    |                 |                    |               |                    | Derivation |
|                                                                                                     |                    |                 |                    |               |                    | Validation |

**Note:** ● = Yes (High quality); ● = No (Low quality); ? = Unclear

**CRAMS**=Circulation, Respiration, Abdomen, Motor, Speech; **PHI**=Pre-Hospital Index; **T-RTS**=Triage-Revised Trauma Score; **PSS**=Physiologic Severity Score; **MGAP**=Mechanism, Glasgow Coma Scale, Age, and Arterial Pressure
